# Supplementary material for: Dual regulation of the native ClC-K2 chloride channel in the distal nephron by voltage and pH
Source: PubMed Central journal article supplement — J Gen Physiol. 2016 Sep;148(3):213–26. doi: 10.1085/jgp.201611623 (PMC5004338; doi:10.1085/jgp.201611623), 2016-09
Supplement: supp_jgp.201611623_JGP_201611623_sm.pdf [file supp_jgp.201611623_JGP_201611623_sm.pdf]

SUPPLEMENTAL MATERIAL

Pinelli et al., <http://www.jgp.org/cgi/content/full/jgp.201611623/DC1>

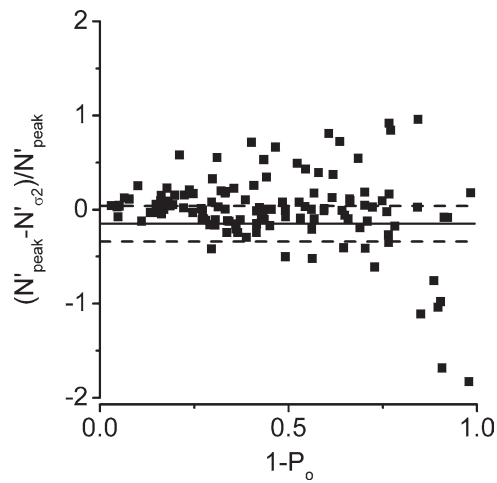

Figure S1. **Comparison of two methods for estimating the number of active channels on patches.** The number of active channels ( $N'$ ) was determined in each stretch of data from (1) the peak current amplitude ( $N'_{\text{peak}} = I_{\text{peak}}/i$ ) and (2) the variance of the patch current ( $N'_{\sigma_2}$ ) as described in Materials and methods. The graph is a modified Bland Altman analysis where  $(N'_{\text{peak}} - N'_{\sigma_2})/N'_{\text{peak}}$  is plotted against  $1 - P_o$  ( $=\sigma^2/\langle I \rangle^2$ ). Each point is a measurement from a stretch of recording at either  $V_m -80$  mV or  $V_m 80$  mV. The continuous line is the mean of 130 determinations, and 95% agreement interval limits ( $\text{mean} \pm 1.96 \cdot \text{SEM}$ ) are represented as dashed lines. Only recordings yielding values within the 95% agreement interval were taken as valid for the estimation of  $N'$  and  $P_o$ .

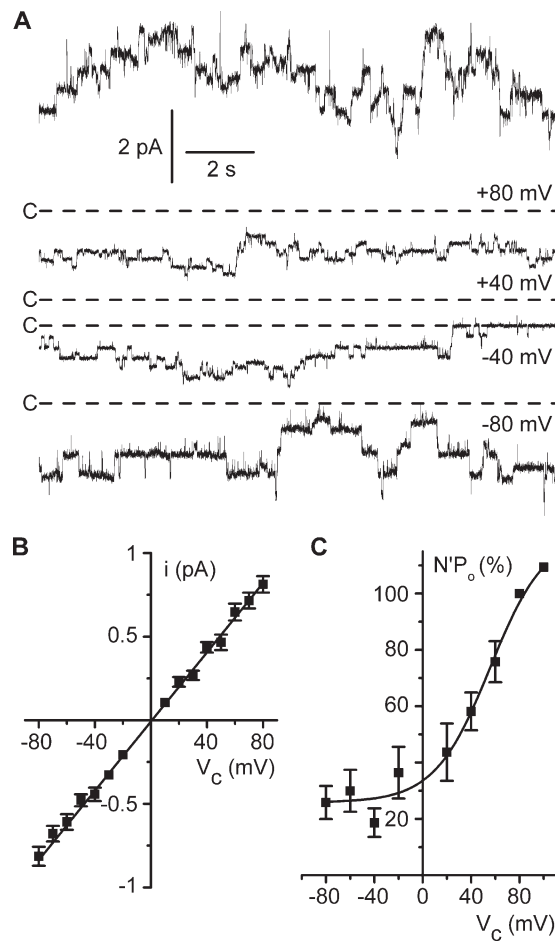

Figure S2. **Channel voltage dependence in the cell-attached configuration.** (A) Representative current recordings at the clamp membrane potentials ( $V_c$ ) values indicated on the right side of each trace. CNTs were bathed in physiological saline solution, and pipettes were filled with a 5 mM  $Ca^{2+}$ -containing NMDG-Cl solution set at pH 7.4. The dashed lines (C-) indicate the closed channel current level for each clamp potential, measured after acidification of the intracellular compartment as described in Materials and methods. (B) Mean  $i/V_c$  relationship obtained in the condition given in A. Each point is the mean of 12 determinations, and SEM is shown as error bars when larger than symbols. (C)  $N'P_o/V_c$  relationship obtained in the conditions given in A.  $N'P_o$  values were normalized to values at  $V_c$  80 mV on the same patch. Each point is the mean of nine measurements, except at  $V_c$  100 mV where  $n = 2$ , and SEM is shown as error bars. The line is a nonlinear least squares fit of mean data points using the Boltzmann equation.

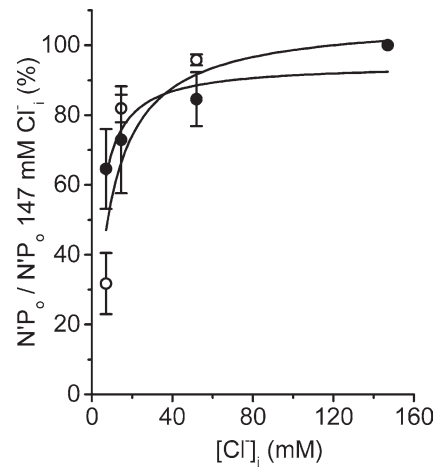

Figure S3. **Channel sensitivity to intracellular chloride concentration.** Cell-excised inside-out membrane patches were exposed to 7–147 mM internal  $\text{Cl}^-$  solutions, and currents were recorded at  $V_m$   $-80$  mV (●) or  $V_m$   $80$  mV (○). Each  $N'P_o$  value at a given internal  $\text{Cl}^-$  concentration was normalized to the paired  $N'P_o$  at  $147$  mM  $\text{Cl}^-$  on the same patch. Data are means of measurements from three to seven patches, and SEM is shown as error bars. Lines are fits of mean data points using a rectangular hyperbola equation yielding  $K_{1/2}$  values of  $3.6 \pm 1.3$  mM internal chloride at  $V_m$   $-80$  mV ( $R^2 = 0.879$ ) and  $9 \pm 5.5$  mM internal chloride at  $V_m$   $80$  mV ( $R^2 = 0.832$ ).

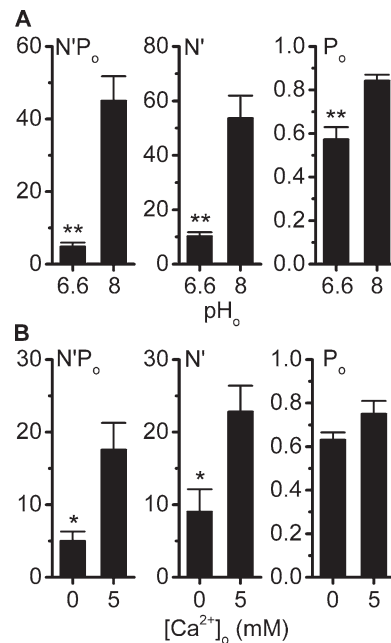

Figure S4.  **$\text{pH}_o$  and  $[\text{Ca}^{2+}]_o$  also modulate the number of active channels.** Experiments were performed under symmetrical NMDG-Cl solutions, at  $V_m$   $80$  mV. (A and B)  $N'P_o$  was measured within 2 min after patch excision into a  $\text{pH}_i$   $7.4$  and calcium-free solution under either  $\text{pH}_o$   $6.6$  or  $8$  ( $[\text{Ca}^{2+}]_o$   $5$  mM; A) or external calcium-free or  $5$  mM  $\text{Ca}^{2+}$  conditions ( $\text{pH}_o$   $7.4$ ; B). The number of active channels ( $N'$ ) was determined by peak current measurements and validated by stationary noise analysis (see Materials and methods), and only recordings yielding  $\Delta N'/N'$  values within the 95% agreement interval were taken as valid ( $\text{pH}_o$   $6.6$ :  $n = 5$  out of 7;  $\text{pH}_o$   $8$ :  $n = 6$  out of 7;  $[\text{Ca}^{2+}]_o$   $0$ :  $n = 3$  out of 5;  $[\text{Ca}^{2+}]_o$   $5$  mM:  $n = 6$  out of 6). Results are given as means, and SEM is shown as error bars. \*,  $P < 0.01$ ; \*\*,  $P < 0.005$ , unpaired Student's  $t$  test.

Table S1. Effects of  $\text{pH}_i$ ,  $\text{pH}_o$ , and  $[\text{Ca}^{2+}]_o$  on single-channel conductive properties

| Condition                     | $g$            | $E_{\text{rev}}$ |
|-------------------------------|----------------|------------------|
|                               | <i>pS</i>      | <i>mV</i>        |
| $\text{pH}_i$ 7.0 (7)         | $11.4 \pm 0.3$ | $0.1 \pm 0.3$    |
| $\text{pH}_i$ 7.4 (12)        | $13.0 \pm 0.5$ | $1.0 \pm 0.4$    |
| $\text{pH}_i$ 7.8 (6)         | $11.6 \pm 0.3$ | $0.5 \pm 0.4$    |
| $\text{pH}_o$ 6.6 (6)         | $12.4 \pm 0.5$ | $1.1 \pm 0.4$    |
| $\text{pH}_o$ 8.0 (9)         | $13.4 \pm 0.1$ | $0.4 \pm 0.2$    |
| $[\text{Ca}^{2+}]_o$ 0 mM (5) | $12.5 \pm 0.2$ | $0.3 \pm 0.6$    |
| $[\text{Ca}^{2+}]_o$ 5 mM (5) | $12.3 \pm 0.5$ | $0.5 \pm 0.7$    |

Single-channel conductances ( $g$ ) and reversal potentials ( $E_{\text{rev}}$ ) were determined in the conditions given in the left column. Data are given as means  $\pm$  SEM for the number of observations in parentheses. Neither  $g$  nor  $E_{\text{rev}}$  were significantly affected by  $\text{pH}_i$ ,  $\text{pH}_o$ , or  $[\text{Ca}^{2+}]_o$  ( $P > 0.2$  for each condition, unpaired  $t$  test).
